# Supplementary material
Source: PubMed Central journal article supplement (PMC5337404)

Supplemental Table 1. Body Mass Index at Diagnosis, Post-Diagnosis Waist Circumference and Incident Cardiovascular Event/Death and Cardiovascular Disease Subtype

| Body Mass Index at Diagnosis                          | Overweight<br>25-<30 kg/m <sup>2</sup><br>N=939             | Class I Obese<br>30-<35 kg/m <sup>2</sup><br>N=510 | Class II/III Obese<br>≥35 kg/m <sup>2</sup><br>N=374 | Normal Weight<br>18.5-<25 kg/m <sup>2</sup><br>N=1286 | Per 5 kg/m <sup>2</sup><br>N=3,109 |
|-------------------------------------------------------|-------------------------------------------------------------|----------------------------------------------------|------------------------------------------------------|-------------------------------------------------------|------------------------------------|
| Mean (SD) BMI                                         | 27.24 (1.40)                                                | 32.00 (1.41)                                       | 39.94 (4.75)                                         | 22.39 (1.66)                                          | 27.54 (6.13)                       |
|                                                       | Hazard Ratio for CVD (95% Confidence Interval) <sup>2</sup> |                                                    |                                                      |                                                       |                                    |
| All cardiovascular disease events/deaths <sup>1</sup> | 283                                                         | 166                                                | 130                                                  | 336                                                   | 915                                |
|                                                       | 1.02 (0.87, 1.20)                                           | 1.14 (0.94, 1.38)                                  | 1.33 (1.08, 1.65)                                    | Ref.                                                  | 1.10 (1.04, 1.17)                  |
| Coronary artery disease                               | 78                                                          | 36                                                 | 38                                                   | 70                                                    | 222                                |
|                                                       | 1.40 (1.01, 1.94)                                           | 1.21 (0.80, 1.83)                                  | 2.00 (1.32, 3.03)                                    | Ref.                                                  | 1.22 (1.09, 1.36)                  |
| Heart failure                                         | 103                                                         | 58                                                 | 57                                                   | 118                                                   | 336                                |
|                                                       |                                                             |                                                    |                                                      |                                                       |                                    |
| Waist Circumference Post-Diagnosis                    | 80-<90 cm<br>N=480                                          | 90-<100 cm<br>N=463                                | ≥100 cm<br>N=417                                     | <80 cm<br>N=535                                       | Per 5 cm<br>N=1,898                |
| Mean (SD) Waist circumference                         | 84.64 (2.71)                                                | 94.61 (2.86)                                       | 110.66 (10.60)                                       | 73.38 (4.67)                                          | 89.61 (14.78)                      |
|                                                       | Hazard Ratio for CVD (95% Confidence Interval) <sup>3</sup> |                                                    |                                                      |                                                       |                                    |
| All cardiovascular disease events/deaths <sup>1</sup> | 154                                                         | 162                                                | 156                                                  | 124                                                   | 596                                |
|                                                       | 1.50 (1.14, 1.97)                                           | 1.63 (1.17, 2.26)                                  | 2.02 (1.37, 2.97)                                    | Ref.                                                  | 1.09 (1.04, 1.14)                  |
| Coronary artery disease                               | 26                                                          | 45                                                 | 39                                                   | 43                                                    | 153                                |
|                                                       | 1.82 (1.10, 3.01)                                           | 1.27 (0.75, 2.15)                                  | 1.69 (0.99, 2.86)                                    | Ref.                                                  | 1.06 (1.00, 1.13)                  |
| Heart failure                                         | 46                                                          | 49                                                 | 55                                                   | 69                                                    | 219                                |
|                                                       | 0.91 (0.59, 1.40)                                           | 1.03 (0.68, 1.57)                                  | 1.57 (1.04, 2.37)                                    | Ref.                                                  | 1.05 (1.00, 1.11)                  |

<sup>1</sup> Cardiovascular disease (CVD) events are composite outcome of both incident CVD events (post-diagnosis heart failure [HF], coronary artery disease [CAD], valve abnormality, arrhythmia or stroke) or death in which CVD was the primary cause. All subtypes of CVD, including HF and CAD, include both incident events or death in which that subtype of CVD was listed as the primary cause.

<sup>2</sup> Adjusted for age in categories (<60, <70, or ≥70 at diagnosis), menopausal status, race/ethnicity (white, black, Asian/Pacific Islander, Hispanic), body mass index at diagnosis, smoking status at diagnosis (never, current or

Cespedes Feliciano et al. Adiposity, Post-Diagnosis Weight Change and Risk of Cardiovascular Events among Early-Stage Breast Cancer Survivors. *Breast Cancer Research and Treatment*.

former), physical activity (MET hours/week of recreational activity at enrollment), tumor stage, hormone receptor status (ER+, PR+, HER2+) and treatment (chemotherapy and/or radiation) characteristics.

<sup>2</sup> Additionally adjusted for body mass index at time of waist measurement.

Supplemental Table 2: Composite Cardiovascular Disease Conditions and Codes

| Condition                          | ICD-9 Codes                                                                                                                                        | CPT-4 Codes        |
|------------------------------------|----------------------------------------------------------------------------------------------------------------------------------------------------|--------------------|
| Heart Failure                      | 425.x, 428.x, 429.x                                                                                                                                |                    |
| Coronary Artery Disease            | 410.x, 411.0, 411.1, 412.x, 413.0, 413.1, 414.0, 414.10, 414.11, 414.12, 414.8, 414.9                                                              |                    |
| Arrhythmia                         | 00.50, 00.51, 37.94, 37.98, 426.11, 426.12, 426.13, 426.3, 426.4, 426.6, 426.7, 427.0, 427.31, 427.32, 427.41, 427.5, 427.6, 427.81, 427.89, 427.9 | 33240-33249, 71090 |
| Valve Abnormalities or Replacement | 424.0, 424.1, 424.2, 424.3, 35.x                                                                                                                   | 33400-33475        |
| Stroke                             | 430.x, 431.x, 432.9, 433.0, 433.1, 433.2, 434.00, 433.01, 434.10, 434.11, 435.0, 435.1, 435.2, 435.3, 435.9, 436.x, 437.0, 437.1                   |                    |

| Condition | ICD-9 Codes                            | ICD-10 Codes                                 |
|-----------|----------------------------------------|----------------------------------------------|
| CVD Death | 390.x-398.x, 402.x, 404.x, 410.x-429.x | I00-I02, I05-I09, I11, I13, I20-I28, I30-I52 |

Supplemental Table 3. Body Mass Index at Diagnosis, Post-Diagnosis Waist Circumference and Incident Cardiovascular Event or Death<sup>1</sup> by Receipt of Chemotherapy\*

| Body Mass Index at Diagnosis                          | Overweight<br>25-<30 kg/m <sup>2</sup>                      | Class I Obese<br>30-<35 kg/m <sup>2</sup> | Class II/III Obese<br>≥35 kg/m <sup>2</sup> | Normal Weight<br>18.5-<25 kg/m <sup>2</sup> | Per 5 kg/m <sup>2</sup> |
|-------------------------------------------------------|-------------------------------------------------------------|-------------------------------------------|---------------------------------------------|---------------------------------------------|-------------------------|
|                                                       | Hazard Ratio for CVD (95% Confidence Interval) <sup>2</sup> |                                           |                                             |                                             |                         |
| Chemotherapy                                          |                                                             |                                           |                                             |                                             |                         |
| All cardiovascular disease events/deaths <sup>1</sup> | 144                                                         | 76                                        | 73                                          | 167                                         | 460                     |
|                                                       | 1.14 (0.91, 1.43)                                           | 1.16 (0.88, 1.54)                         | 1.37 (1.03, 1.82)                           | Ref.                                        | 1.09 (1.01, 1.18)       |
| Coronary artery disease                               | 2.13 (1.31, 3.48)                                           | 1.58 (0.85, 2.94)                         | 2.53 (1.39, 4.60)                           | Ref.                                        | 1.24 (1.07, 1.44)       |
| Heart failure                                         | 1.31 (0.91, 1.89)                                           | 1.06 (0.66, 1.7)                          | 1.77 (1.14, 2.75)                           | Ref.                                        | 1.15 (1.02, 1.29)       |
| No Chemotherapy                                       |                                                             |                                           |                                             |                                             |                         |
| All cardiovascular disease events/deaths <sup>1</sup> | 139                                                         | 90                                        | 57                                          | 169                                         | 455                     |
|                                                       | 0.91 (0.73, 1.15)                                           | 1.16 (0.89, 1.51)                         | 1.30 (0.95, 1.79)                           | Ref.                                        | 1.13 (1.04, 1.22)       |
| Coronary artery disease                               | 1.00 (0.64, 1.57)                                           | 0.93 (0.53, 1.63)                         | 1.62 (0.90, 2.94)                           | Ref.                                        | 1.18 (1.00, 1.38)       |
| Heart failure                                         | 0.81 (0.55, 1.21)                                           | 1.15 (0.73, 1.8)                          | 1.67 (0.99, 2.81)                           | Ref.                                        | 1.27 (1.10, 1.46)       |
| Waist Circumference Post-Diagnosis                    | 80-<90 cm                                                   | 90-<100 cm                                | ≥100 cm                                     | <80 cm                                      | Per 5 cm                |
|                                                       | Hazard Ratio for CVD (95% Confidence Interval) <sup>3</sup> |                                           |                                             |                                             |                         |
| Chemotherapy                                          |                                                             |                                           |                                             |                                             |                         |
| All cardiovascular disease events/deaths <sup>1</sup> | 92                                                          | 44                                        | 40                                          | 113                                         | 289                     |
|                                                       | 1.28 (0.92, 1.79)                                           | 1.10 (0.78, 1.55)                         | 1.56 (1.10, 2.22)                           | Ref.                                        | 1.05 (1.01, 1.10)       |
| Coronary artery disease                               | 2.91 (1.31, 6.46)                                           | 1.76 (0.76, 4.1)                          | 3.54 (1.57, 7.95)                           | Ref.                                        | 1.12 (1.03, 1.21)       |
| Heart failure                                         | 1.30 (0.72, 2.36)                                           | 1.40 (0.78, 2.52)                         | 1.97 (1.10, 3.52)                           | Ref.                                        | 1.07 (1.01, 1.14)       |
| No Chemotherapy                                       |                                                             |                                           |                                             |                                             |                         |
| All cardiovascular disease events/deaths <sup>1</sup> | 98                                                          | 52                                        | 34                                          | 123                                         | 307                     |
|                                                       | 1.34 (0.95, 1.90)                                           | 1.40 (0.99, 1.98)                         | 1.58 (1.11, 2.25)                           | Ref.                                        | 1.04 (1.00, 1.09)       |
| Coronary artery disease                               | 1.35 (0.72, 2.54)                                           | 1.17 (0.61, 2.23)                         | 1.25 (0.64, 2.43)                           | Ref.                                        | 1.04 (0.96, 1.12)       |
| Heart failure                                         | 0.84 (0.47, 1.49)                                           | 0.82 (0.46, 1.47)                         | 1.66 (0.96, 2.87)                           | Ref.                                        | 1.06 (0.99, 1.13)       |

\* 78% of chemotherapy was with doxorubicin-containing regimens

Cespedes Feliciano et al. Adiposity, Post-Diagnosis Weight Change and Risk of Cardiovascular Events among Early-Stage Breast Cancer Survivors. *Breast Cancer Research and Treatment*.

<sup>1</sup> Cardiovascular disease (CVD) events are composite outcome of both incident CVD events (post-diagnosis heart failure [HF], coronary artery disease [CAD], valve abnormality, arrhythmia or stroke) or death in which CVD was the primary cause. All subtypes of CVD, including HF and CAD, include both incident events or death in which that subtype of CVD was listed as the primary cause.

<sup>2</sup> Adjusted for age in categories ( $\leq 60$ ,  $< 70$ , or  $\geq 70$  at diagnosis), menopausal status, race/ethnicity (white, black, Asian/Pacific Islander, Hispanic), body mass index at diagnosis, smoking status at diagnosis (never, current or former), physical activity (MET hours/week of recreational activity at enrollment), tumor stage, hormone receptor status (ER+, PR+, HER2+) and treatment (chemotherapy and/or radiation) characteristics.

<sup>2</sup> Additionally adjusted for body mass index at time of waist measurement.

Supplemental Table 4. Post-Diagnosis Weight Change and Incident Cardiovascular Disease Event or Death  
N=1,903; events = 599

|                                                                | ≥10 lb loss                                                 | 5-<10 lb loss     | 5-<10 lb gain     | ≥10 lb gain       | +/- 5 lb stable |
|----------------------------------------------------------------|-------------------------------------------------------------|-------------------|-------------------|-------------------|-----------------|
|                                                                | Hazard Ratio for CVD (95% Confidence Interval) <sup>2</sup> |                   |                   |                   |                 |
| Normal weight at diagnosis (n=834)<br>BMI<25-kg/m <sup>2</sup> |                                                             |                   |                   |                   |                 |
| Events <sup>1</sup>                                            | 16                                                          | 20                | 32                | 66                | 103             |
|                                                                | 0.97 (0.54, 1.76)                                           | 1.52 (0.92, 2.49) | 0.88 (0.57, 1.37) | 1.05 (0.73, 1.52) | Ref.            |
| Overweight at diagnosis (n=601)<br>BMI25-<30-kg/m <sup>2</sup> |                                                             |                   |                   |                   |                 |
| Events <sup>1</sup>                                            | 23                                                          | 24                | 21                | 52                | 72              |
|                                                                | 0.92 (0.55, 1.52)                                           | 1.03 (0.63, 1.68) | 1.05 (0.62, 1.79) | 0.95 (0.63, 1.44) | Ref.            |
| Obese at diagnosis (n=468)<br>BM≥30-kg/m <sup>2</sup>          |                                                             |                   |                   |                   |                 |
| Events <sup>1</sup>                                            | 53                                                          | 15                | 15                | 33                | 54              |
|                                                                | 1.24 (0.81, 1.90)                                           | 0.85 (0.46, 1.58) | 1.01 (0.55, 1.88) | 1.20 (0.73, 1.97) | Ref.            |

<sup>1</sup> CVD events are composite outcome of both incident CVD events (post-diagnosis heart failure, coronary artery disease, valve abnormality, arrhythmia or stroke) or death in which CVD was the primary cause

<sup>2</sup> Adjusted for age in categories (=<60, <70, or >=70 at diagnosis), menopausal status, race/ethnicity (white, black, Asian/Pacific Islander, Hispanic), body mass index at diagnosis, smoking status at diagnosis (never, current or former), physical activity (MET hours/week of recreational activity at enrollment), tumor stage, hormone receptor status (ER+, PR+, HER2+) and treatment (chemotherapy and/or radiation) characteristics.

Supplemental Figure 1. Unadjusted Kaplan-Meier curves of Cardiovascular Disease-Free Survival by Waist Circumference 24 Months Post-Diagnosis

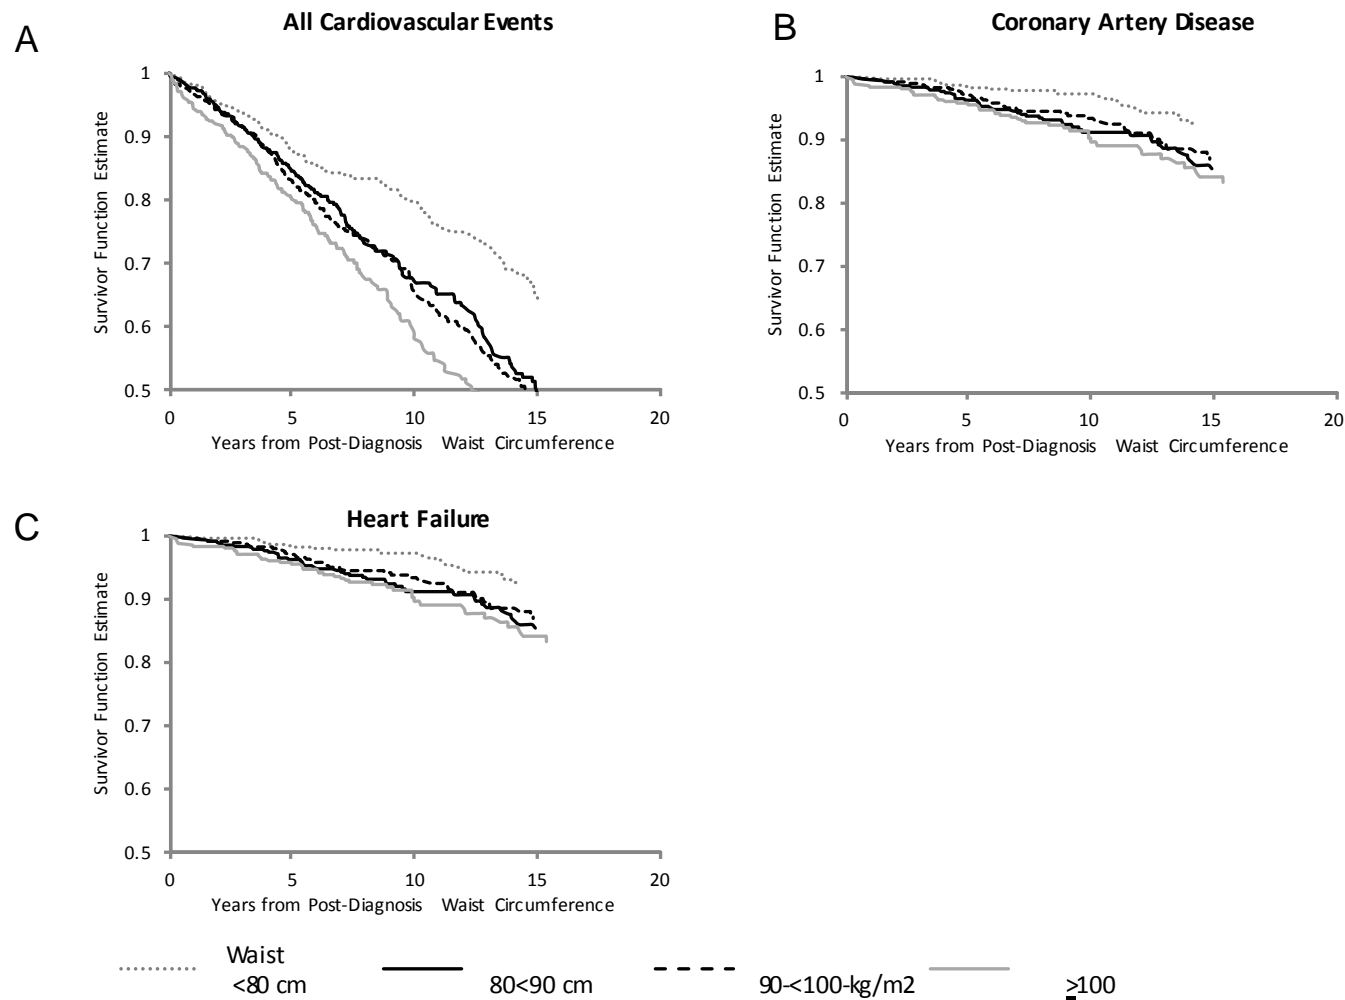

Supplement: NIHMS850534-supplement-10549_2017_4133_MOESM1_ESM.pdf [file NIHMS850534-supplement-10549_2017_4133_MOESM1_ESM.pdf]
